# Supplementary material for: The Role and Clinical Outcomes of Endoscopic Spine Surgery of Treating Spinal Metastases; Outcomes of 29 Cases From 8 Countries
Source: PubMed Central journal article supplement — Neurospine. 2023 Jun 30;20(2):608–19. doi: 10.14245/ns.2346274.137 (PMC10323327; doi:10.14245/ns.2346274.137), 2023-06-30
Supplement: ns-2346274-137-Supplementary-Table-2.pdf [file ns-2346274-137-Supplementary-Table-2.pdf]

**Supplementary Table 2.** Summary of the previous reports of endoscopic surgery in spinal metastases patients

| Study                                    | No. | Sex/age (yr) | Primary tumor     | Level | Techniques                  | Results                                                                                       | Complication |
|------------------------------------------|-----|--------------|-------------------|-------|-----------------------------|-----------------------------------------------------------------------------------------------|--------------|
| Joo et al., <sup>28</sup> 2012           | 1   | M/82         | Colon             | T11   | Transforaminal              | The pain disappeared immediately after surgery.                                               | None         |
| Tsai et al., <sup>29</sup> 2018          | 1   | M/80         | Liver             | S1    | Interlaminar                | VAS arm pain decreased from 8 to 2 at 3 months after the surgery                              | NR           |
| Gao et al., <sup>30</sup> 2012           | 1   | F/71         | Colon             | L3    | Transforaminal (both sides) | Prompt and permanent pain relief until the patient died 6 months later                        | None         |
| Senturk and Unsal, <sup>31</sup> 2020    | 1   | F/72         | Lung              | L3    | Interlaminar                | Rapid pain relief after surgery                                                               | NR           |
| Henderson et al., <sup>32</sup> 2020     | 2   | F/61         | Ovary             | L2    | Transforaminal              | Complete pain reliefs and resolution of weakness                                              | None         |
|                                          |     | M/50         | Urothelial cell   | L5    | Transforaminal              | Partial pain relief                                                                           | None         |
| Telfeian et al., <sup>33</sup> 2020      | 4   | F/16         | Ewings-like tumor | T6    | Transforaminal              | Immediate pain relief                                                                         | None         |
|                                          |     | F/75         | Lung              | L5    | Transforaminal              | NR                                                                                            | None         |
|                                          |     | M/76         | Prostate          | L4    | Transforaminal              | Significant improvement of pain and motor recovery; remained symptom free at 1 year follow-up | None         |
|                                          |     | M/85         | Prostate          | L3    | Transforaminal              | Significant pain relief after surgery; remained symptom free at 1-year follow-up              | None         |
| Kotheeranurak et al., <sup>34</sup> 2022 | 1   | M/54         | Liver             | C4–5  | Interlaminar                | VAS arm pain decreased from 7 to 1 after the surgery                                          | None         |

L, lumbar; T, thoracic; VAS, visual analogue scale; NR, not reported.
